# Supplementary material
Source: publisher figshare collection journal article supplement (https://diabetesjournals.figshare.com/articles/dataset/_/21346746)
Supplement: Supplementary file 1 [file 1]

## Supplementary materials

**Supplementary Table 1 — The risk of mortality in patients with acute liver injury with or without hypoglycemia.**

|                                              | Acute liver injury<br>with hypoglycemia |       | Acute liver injury<br>without<br>hypoglycemia |       | Crude model                                  |         | Adjusted model <sup>a</sup>                  |         |
|----------------------------------------------|-----------------------------------------|-------|-----------------------------------------------|-------|----------------------------------------------|---------|----------------------------------------------|---------|
|                                              | n                                       | IR    | n                                             | IR    | hazard ratio<br>(95% confidence<br>interval) | P-value | hazard ratio<br>(95% confidence<br>interval) | P-value |
| All-cause mortality <sup>b</sup>             | 42                                      | 22.87 | 1290                                          | 18.38 | 1.37 (1.01-1.86)                             | 0.04513 | 1.30 (0.95-1.77)                             | 0.10122 |
| All-cause mortality in 90 days <sup>c</sup>  | 1                                       | 77.4  | 362                                           | 82.42 | 0.94 (0.13-6.70)                             | 0.95329 | 0.67 (0.09-4.77)                             | 0.68608 |
| All-cause mortality in 365 days <sup>d</sup> | 8                                       | 71.58 | 605                                           | 36.57 | 1.97 (0.98-3.95)                             | 0.05712 | 1.50 (0.75-3.04)                             | 0.25432 |

a: Adjusted model adjusted age, gender, smoking, alcohol, overweight, obesity, severe obesity, HBV infection and therapy, HCV infection and

therapy, CKD, COPD, CCI score, DCSI, diabetic duration, metformin, sulfonylurea, TZD, DDP-4i, insulin basal, insulin premixed, insulin basal and bolus, anti-diabetic number, ACEI/ARB, beta-blocker, CCB, diuretics, statin, fibrate, aspirin, and enrolled research year.

Abbreviation: HBV, Hepatitis B virus infection; HCV, Hepatitis C virus infection; CKD, chronic kidney disease; COPD, chronic obstructive pulmonary disease; CCI, Charlson Comorbidity Index; DCSI, The Diabetes Complications Severity Index; TZD, thiazolidinedione; DDP-4i, dipeptidyl peptidase-4 inhibitor; ACEi, angiotension-converting enzyme inhibitor; ARB, angiotensin receptor blockers; CCB, calcium channel blocker.

<sup>b</sup>: patients with or without hypoglycemia during the follow-up period before mortality.

<sup>c</sup>: patients with or without hypoglycemia within 90 days after discharge before mortality.

<sup>d</sup>: patients with or without hypoglycemia within 365 days after discharge before mortality.

**Supplementary Table 2 — The risk for diabetic patients with or without acute liver injury in multivariate Cox’s regression analysis (sensitivity analysis).**

|                             | With acute liver injury |         | Without acute liver injury |        | Crude model                               |         | Adjusted model <sup>a</sup>               |         |
|-----------------------------|-------------------------|---------|----------------------------|--------|-------------------------------------------|---------|-------------------------------------------|---------|
|                             | n                       | IR      | n                          | IR     | hazard ratio<br>(95% confidence interval) | P-value | hazard ratio<br>(95% confidence interval) | P-value |
| hypoglycemia                | 238                     | 1829.56 | 983                        | 708.41 | 2.58 (2.24-2.97)                          | <0.001  | 2.29 (1.87-2.82)                          | <0.001  |
| Competing risk <sup>b</sup> |                         |         |                            |        | 2.29 (1.87-2.82)                          | <0.001  | 2.19 (1.79-2.69)                          | <0.001  |
| Hypoglycemia in 90 days     | 42                      | 14.25   | 170                        | 5.59   | 2.54 (1.82-3.57)                          | <0.001  | 2.34 (1.40-3.91)                          | 0.0011  |
| Competing risk <sup>b</sup> |                         |         |                            |        | 2.34 (1.40-3.91)                          | 0.0011  | 2.30 (1.38-3.82)                          | 0.0013  |
| Hypoglycemia in 365 days    | 91                      | 8.19    | 336                        | 2.9    | 2.81 (2.23-3.54)                          | <0.001  | 2.12 (1.50-2.98)                          | <0.001  |
| Competing risk <sup>b</sup> |                         |         |                            |        | 2.12 (1.50-2.98)                          | <0.001  | 2.07 (1.46-2.95)                          | <0.001  |

|                                 |      |       |      |       |                  |        |                  |        |
|---------------------------------|------|-------|------|-------|------------------|--------|------------------|--------|
| All-cause mortality             | 1053 | 21.85 | 1961 | 3.85  | 5.60 (5.20-6.04) | <0.001 | 2.65 (2.36-2.98) | <0.001 |
| All-cause mortality in 90 days  | 286  | 96.83 | 838  | 27.54 | 3.48 (3.05-3.98) | <0.001 | 2.28 (1.83-2.83) | <0.001 |
| All-cause mortality in 365 days | 491  | 43.99 | 1078 | 9.3   | 4.68 (4.20-5.20) | <0.001 | 2.29 (1.92-2.72) | <0.001 |

---

n, case number; IR, incidence rate, per 1.000 person-years,

a: Adjusted model adjusted age, gender, smoking, alcohol, overweight, obesity, severe obesity, HBV infection and therapy, HCV infection and therapy, CKD, COPD, CCI score, DCSI, diabetic duration, metformin, sulfonylurea, TZD, DDP-4i, insulin basal, insulin premixed, insulin basal and bolus, anti-diabetic number, ACEI/ARB, beta-blocker, CCB, diuretics, statin, fibrate, aspirin, and enrolled research year.

Abbreviation: HBV, Hepatitis B virus infection; HCV, Hepatitis C virus infection; CKD, chronic kidney disease; COPD, chronic obstructive pulmonary disease; CCI, Charlson Comorbidity Index; DCSI, The Diabetes Complications Severity Index; TZD, thiazolidinedione; DDP-4i, dipeptidyl peptidase-4 inhibitor; ACEi, angiotension-converting enzyme inhibitor; ARB, angiotensin receptor blockers; CCB, calcium channel blocker.

<sup>b</sup>: Taking death as a competing risk for sub-distribution competing risk analysis of hypoglycemia.

## **Supplementary figure captions**

**Supplementary Figure 1** — Flowchart of the selection of cohorts from the National Health Insurance Research Database

**Supplementary Figure 2** — The cumulative incidence of all-cause mortality between patients with and without acute liver injury. (*A*) within 90 days (*B*) within 365 days after discharge and after propensity score matching.
